# Supplementary material
Source: PubMed Central journal article supplement (PMC7213794)
Supplement: jciinsight-5-131828-s143.pdf [file jciinsight-5-131828-s143.pdf]

## Supplemental Figure 1

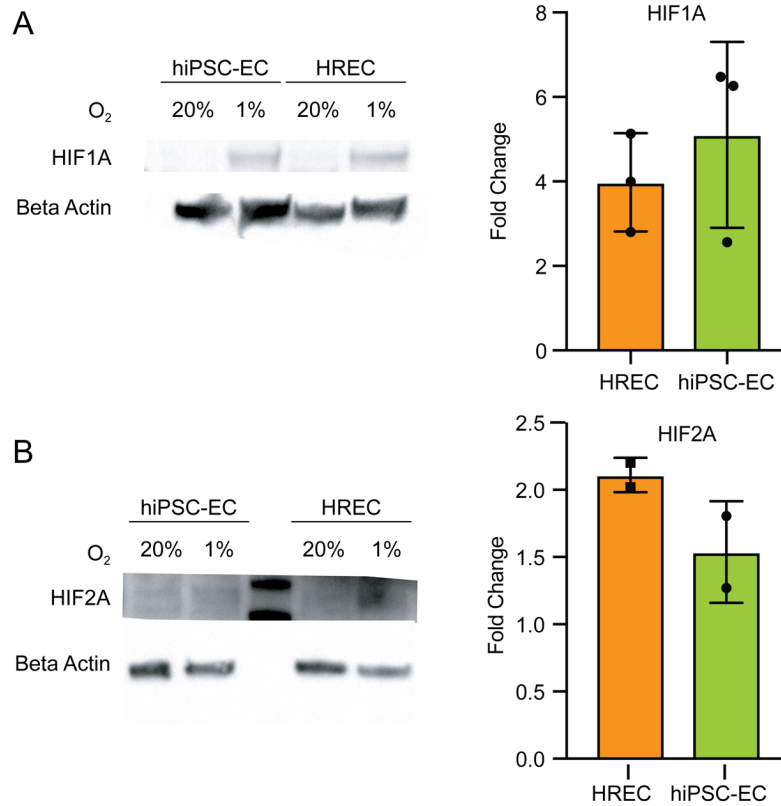

### Supplementary Figure 1: Hypoxia inducible factor (HIF)1A and HIF2A expression. (A)

Western blot and corresponding quantification show similar accumulation of HIF1A (N = 3) and (B) HIF2A (N = 2) under hypoxic conditions in both hiPSC-ECs and human retinal endothelial cells (HRECs) after exposure to hypoxia. Data is presented as mean ± SD.

**Supplemental Figure 2**

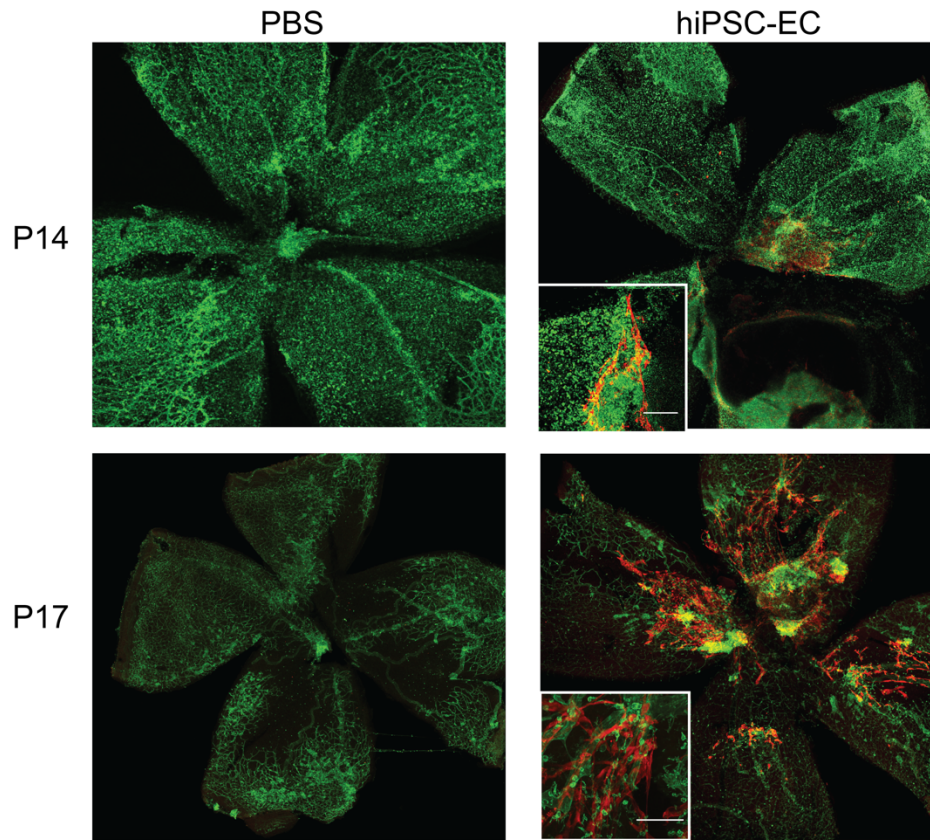

**Supplementary Figure 2: hiPSC-EC (red) co-localization with host vasculature (lectin, green) at an early time point.** The hiPSC-ECs injected at P12 show co-localization with host vasculature as early as P14 (top) with continued co-localization at P17 (bottom).

### Supplemental Figure 3

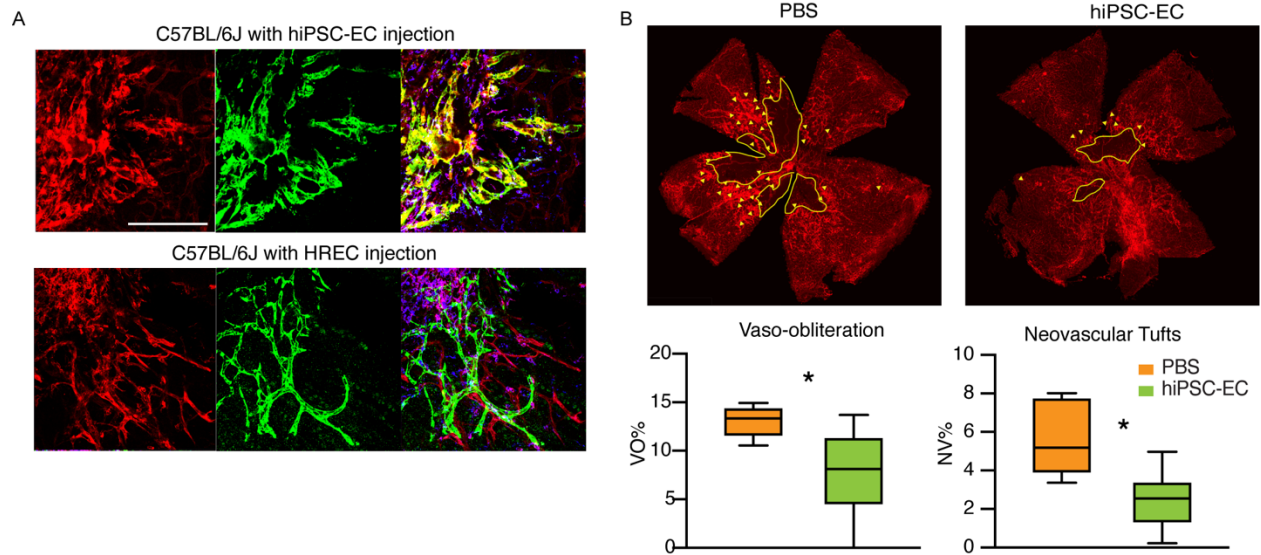

### Supplementary Figure 3: hiPSC-ECs injected in immunocompetent C57BL/6J mice.

Similar to immunodeficient mice (NOD/SCID), **(A)** hiPSC-ECs (green) injected into immunocompetent C57BL/6J mice show similar patterns of co-localization with host vasculatures (top, lectin, red) whereas HREC injected eyes show limited co-localization (bottom). **(B)** Significant reduction in vascular obliteration (VO) and pathological retinal neovascularization (NV) by hiPSC-ECs in oxygen induced retinopathy (OIR) model without any signs of host-rejection (N=6). Box represents 25<sup>th</sup> to 75<sup>th</sup> percentile, line at median value, whiskers represent min and max value. Significance level are set at \* $p \leq 0.05$  by 2-tailed student's t-test. Scale bar = 200  $\mu\text{m}$ .

## Supplemental Table 1

### Antibodies used in this study

| <b>Antibody</b> | <b>Source</b>           | <b>Catalog #</b> | <b>Purpose</b> | <b>Host Species and Reactivity</b> | <b>Concentration</b> |
|-----------------|-------------------------|------------------|----------------|------------------------------------|----------------------|
| AlexaFluor 488  | ThermoFisher Scientific | A11008           | IF             | Goat anti-rabbit                   | 1:1000               |
| AlexaFlour 546  | ThermoFisher Scientific | A1030            | IF             | Goat anti-mouse                    | 1:1000               |
| Beta Actin      | Abcam                   | ab8226           | WB             | Mouse anti-human                   | 1:2000               |
| CD31            | Abcam                   | ab32457          | IF             | rabbit anti-human                  | 1:200                |
| CD31-PE         | BD                      | 555446           | MACS           | Mouse anti-human                   | 1:20                 |
| CXCR4-PE        | BioLegend               | 146505           | FC             | Mouse anti-human                   | 1:20                 |
| DAPI            | Roche                   | 10236276         | IF             | Nuclei                             | 1:1000               |
| IgG-PE          | BD                      | 555749           | FC             | Mouse anti-human                   | 1:20                 |

|                                 |                              |               |                                   |                              |                   |
|---------------------------------|------------------------------|---------------|-----------------------------------|------------------------------|-------------------|
| AlexaFlour 546-<br>Phalloidin   | ThermoFisher<br>Scientific   | A22283        | IF                                | F-actin                      | 1:1000            |
| AlexaFlour 488-<br>Phalloidin   | ThermoFisher<br>Scientific   | A12379        | IF                                | F-actin                      | 1:1000            |
| AlexaFluor 635-<br>Phalloidin   | ThermoFisher<br>Scientific   | A34054        | IF                                | F-actin                      | 1:1000            |
| HRP-linked,<br>anti- rabbit IgG | Cell Signaling<br>Technology | 7074          | WB                                | Goat anti-<br>rabbit         | 1:2000            |
| HRP-linked,<br>anti-mouse IgG   | Cell Signaling<br>Technology | 7076          | WB                                | Horse anti-<br>mouse         | 1:2000            |
| <u>CXCR4</u>                    | <u>R&amp;D Systems</u>       | <u>MAB170</u> | <u>Intravitreal<br/>injection</u> | <u>Mouse anti-<br/>human</u> | <u>0.25-0.5ug</u> |
| VEcad                           | Santa Cruz                   | sc-9989       | IF                                | Mouse anti-<br>human         | 1:200             |
